# Supplementary material for: A mechanistic study on multifunctional Fei-Phos ligand-controlled asymmetric palladium-catalyzed allylic substitutions
Source: Royal Society of Chemistry journal article supplement (doi:10.1039/c6ra15665g), 2016-01-01
Supplement: c6ra15665g1.pdf [file c6ra15665g1.pdf]

## Supporting Information

### A Mechanistic Study on Multifunctional Fei-Phos Ligand-controlled Asymmetric Palladium -Catalyzed Allylic Substitutions

Jian-Xing Xu<sup>a</sup>, Fei Ye<sup>a</sup>, Xing-Feng Bai<sup>a,b</sup>, Yu-Ming Cui<sup>a</sup>, Zheng Xu<sup>a</sup>,  
Zhan-Jiang Zheng<sup>a</sup>, and Li-Wen Xu<sup>a,b\*</sup>

<sup>a</sup> Key Laboratory of Organosilicon Chemistry and Material Technology of Ministry of Education, Hangzhou Normal University

Fax: (+) 86-571-28867756, E-mail: liwenxu@hznu.edu.cn

<sup>b</sup> State Key Laboratory for Oxo Synthesis and Selective Oxidation, Lanzhou Institute of Chemical Physics (CAS) and University of the Chinese Academy of Sciences, P. R. China

### Table of Contents

1. **Figure S1. Potential energy for coordination of Fei-Phos with palladium center calculated at B3LYP/6-31G(d,p) level of theory (B3LYP/6-31G(d,p) for C, H, P, N of Fei-Phos; LanL2DZ for Pd).....S2**
2. **Figure S2. Plot of conversion versus time (min) showing the different reaction rate in the AAA reaction of MeOH and MeOD under the optimized reaction conditions.....S3**
3. **Figure S3. Plot of conversion versus time (min) showing the reaction rate in the AAA reaction of benzyl alcohol under the optimized reaction conditions.....S4**
4. **Figure S4. <sup>31</sup>P-NMR and <sup>1</sup>H-NMR analysis of the mixture of Pd/Fei-Phos with two substrates respectively.....S5**

**Figure S1.** Potential energy for coordination of Fei-Phos with palladium center calculated at B3LYP/6-31G(d,p) level of theory (B3LYP/6-31G(d,p) for C, H, P, N of Fei-Phos; LanL2DZ for Pd).

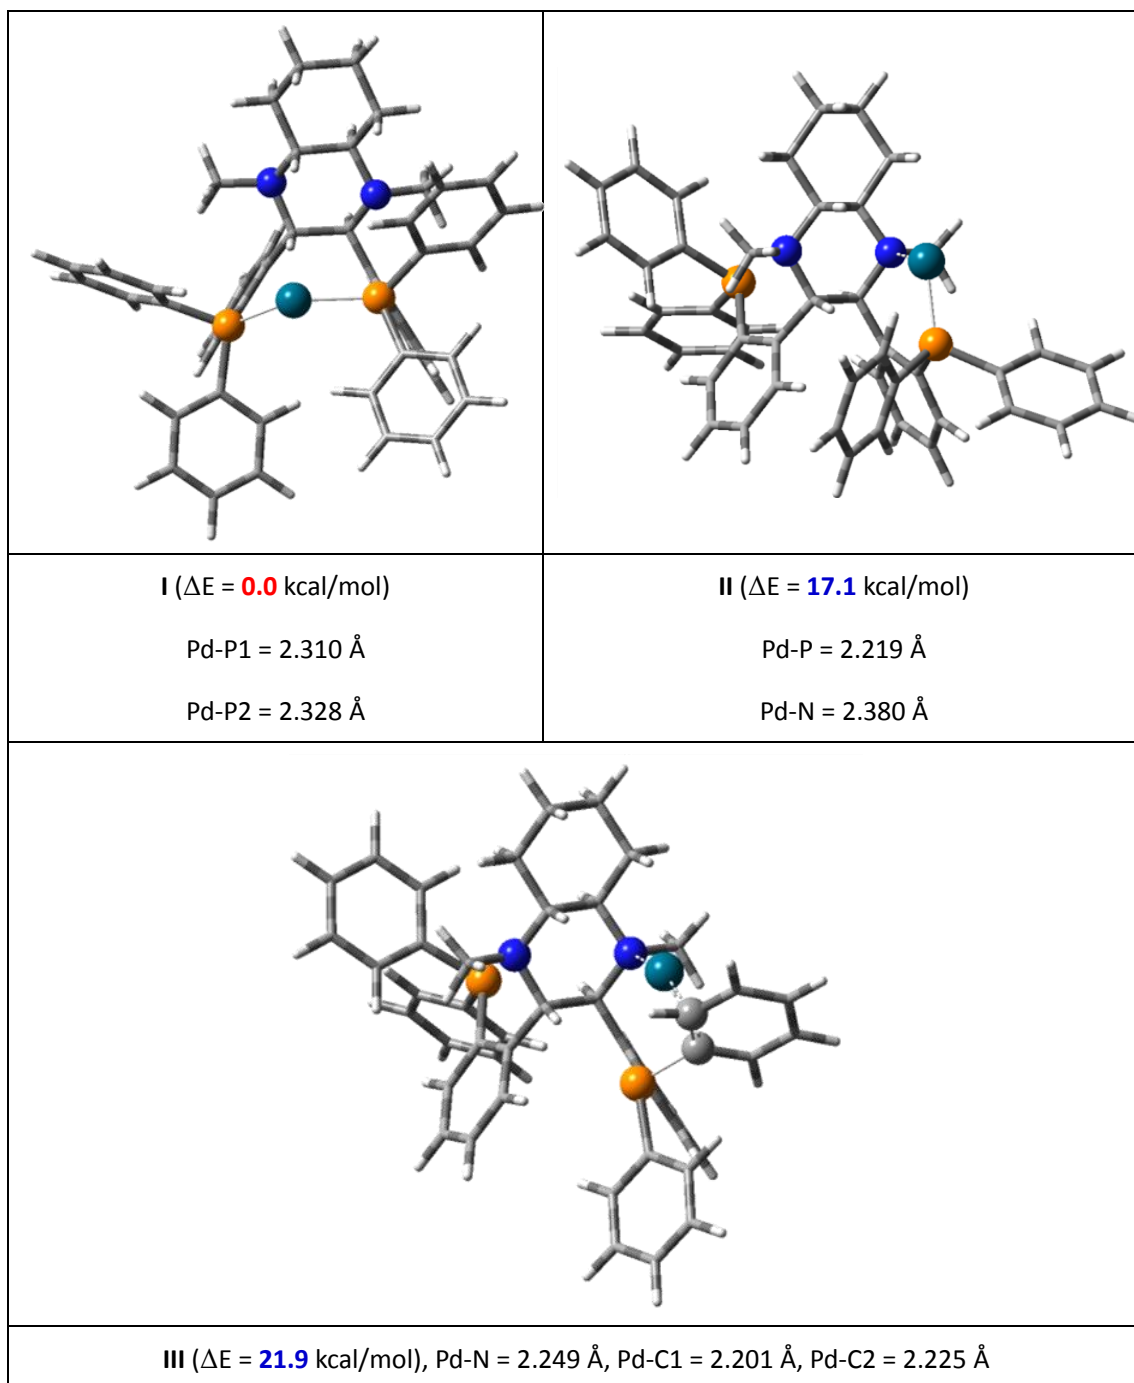

I) Pd center coordinates to two phosphine

II) Pd center coordinates to one phosphine and one nitrogen

III) Pd center coordinates to one nitrogen and one C=C bond of the phenyl ring.

**Figure S2.** Plot of conversion versus time (min) showing the different reaction rate in the AAA reaction of MeOH and MeOD under the optimized reaction conditions: a) MeOH (◆); b) deuterium-modified methanol (MeOD, ■ ).

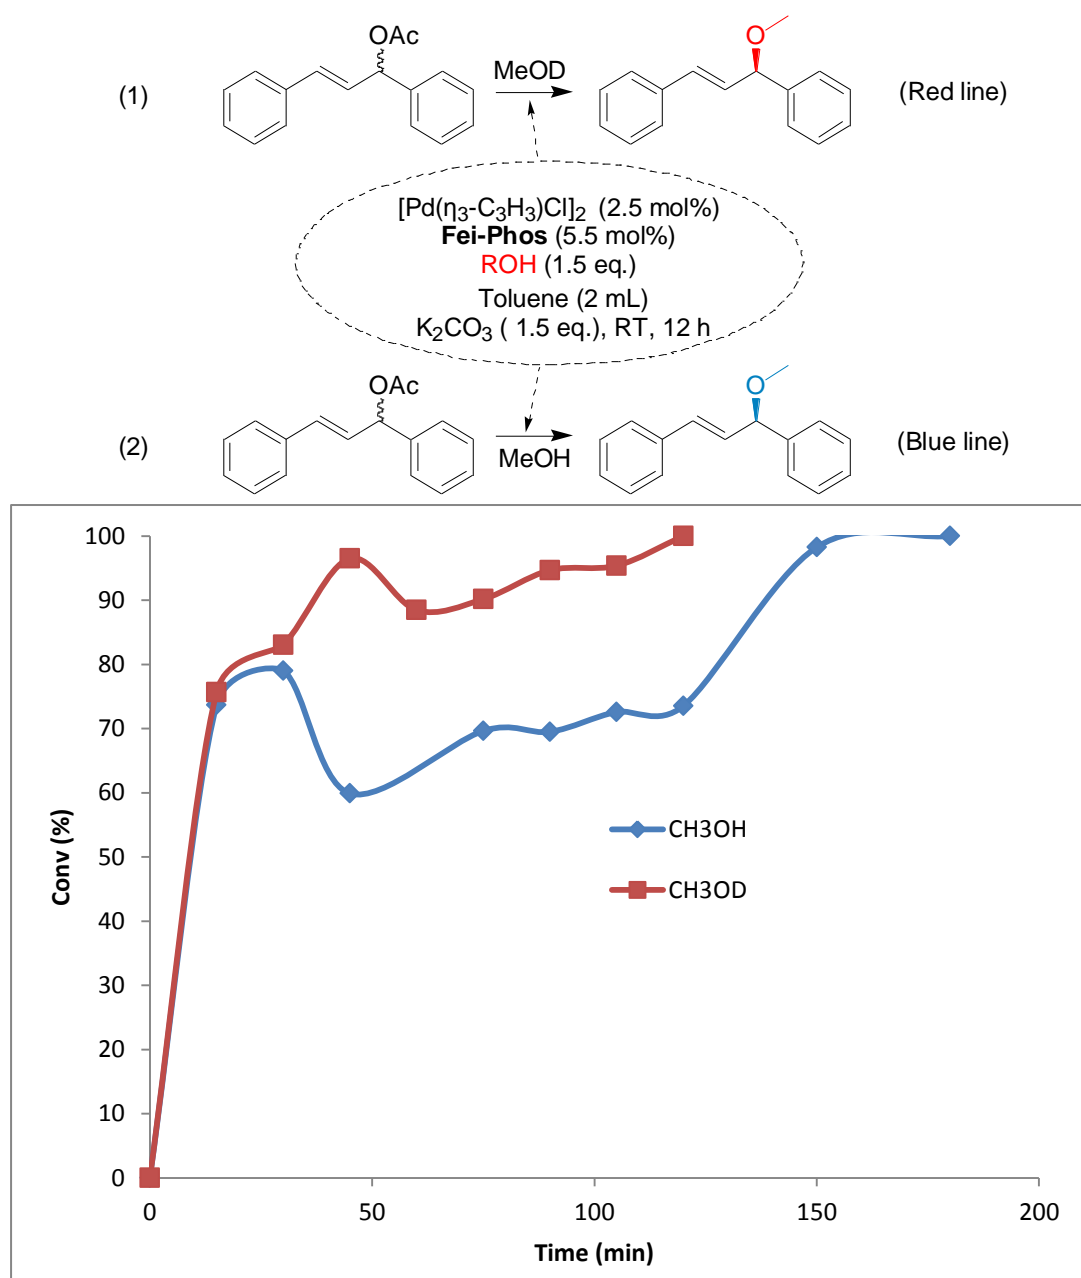

**Figure S3.** Plot of conversion versus time (min) showing the reaction rate in the AAA reaction of benzyl alcohol under the optimized reaction conditions.

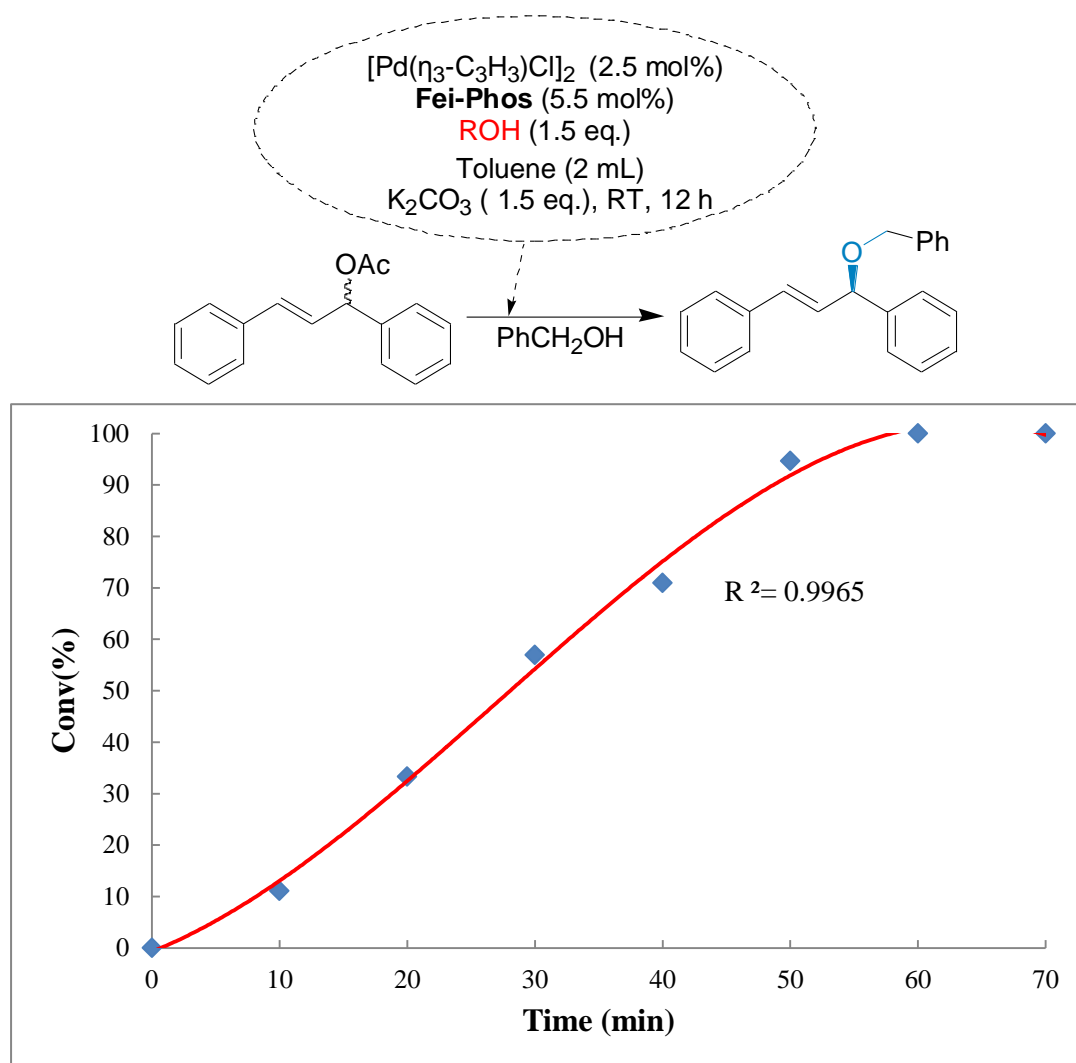

Figure S4.  $^{31}\text{P}$ -NMR and  $^1\text{H}$ -NMR analysis of the mixture of Pd/Fei-Phos with two substrates respectively.

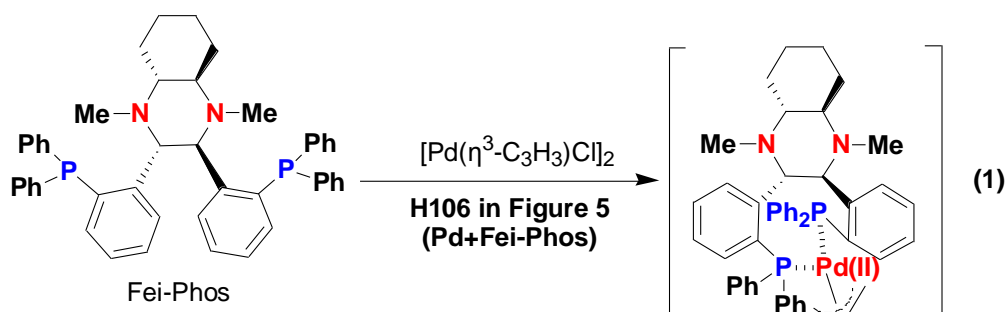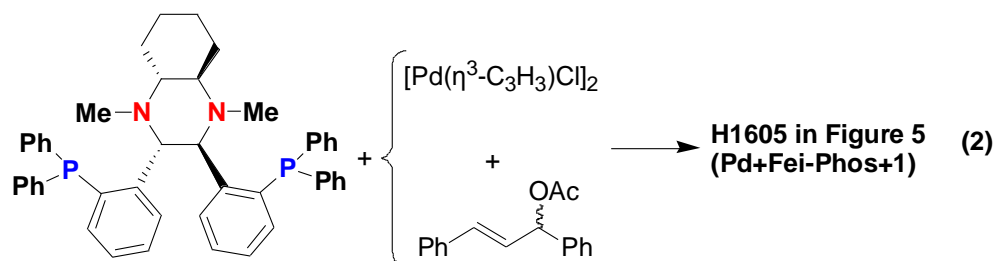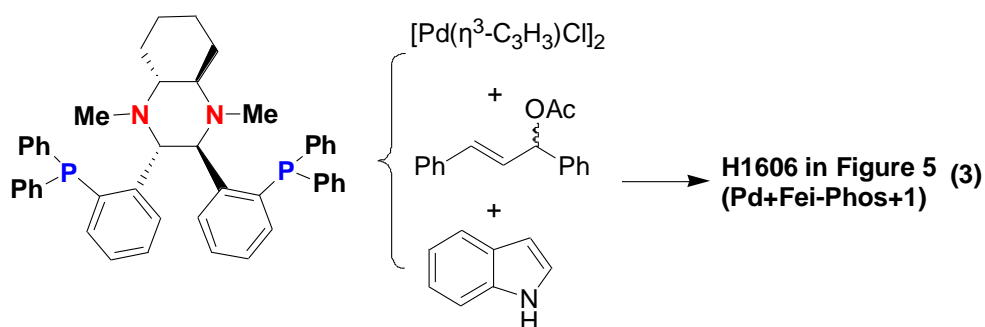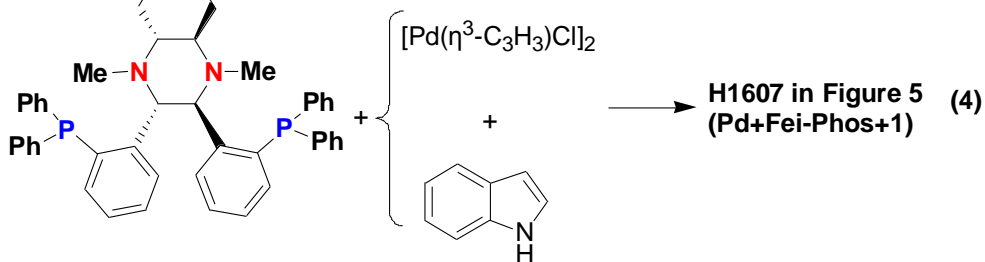

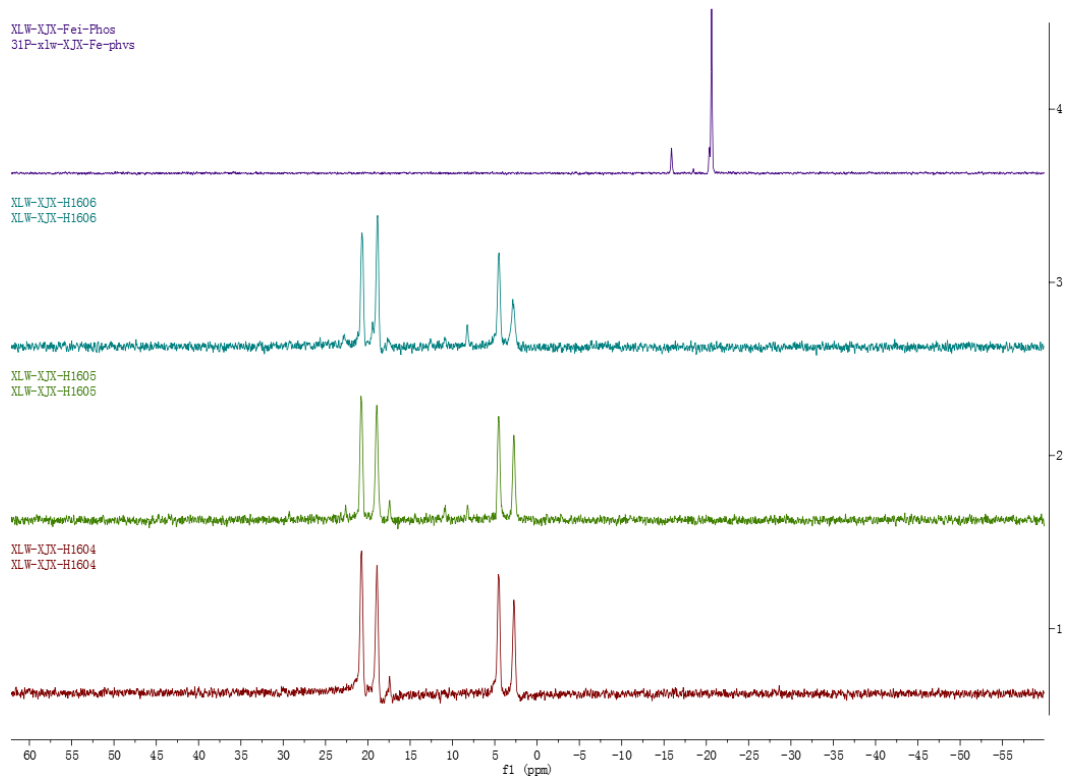

### **<sup>31</sup>P NMR analysis of Pd/Fei-Phos complex**

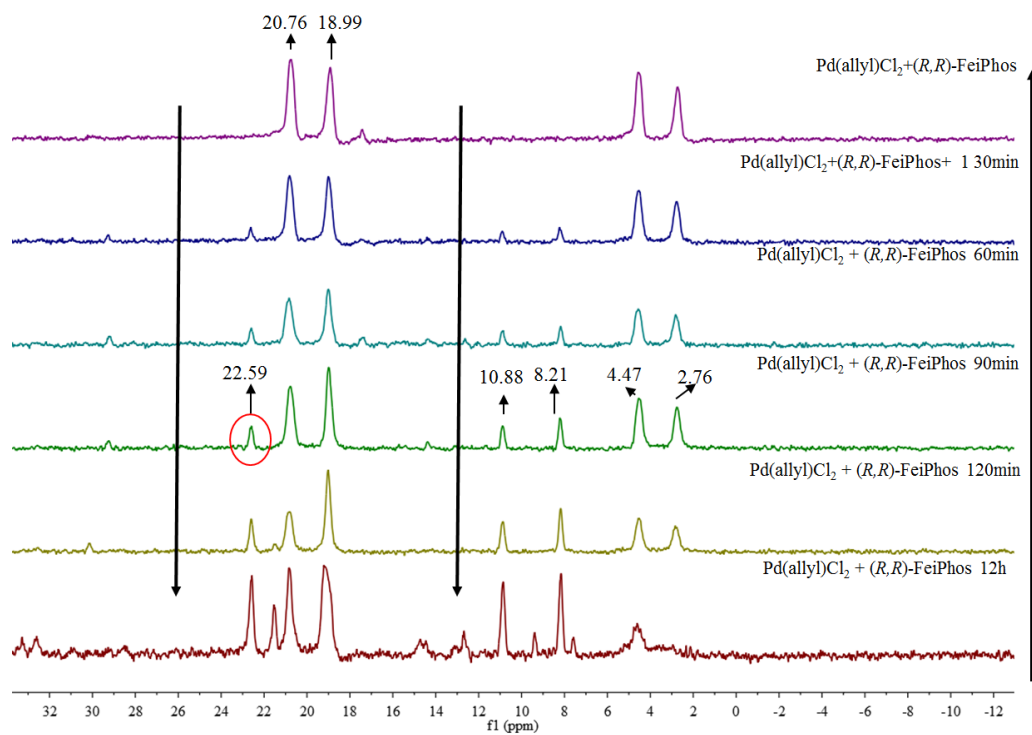

**Figure S4-1.** <sup>31</sup>P-NMR analysis

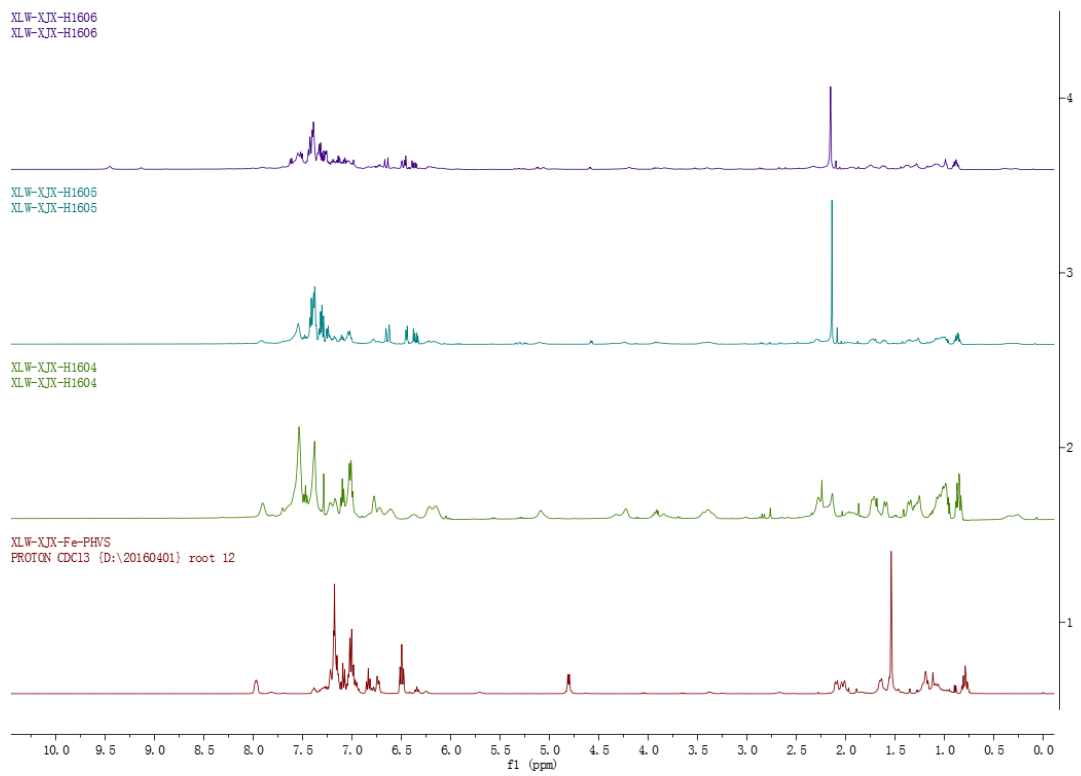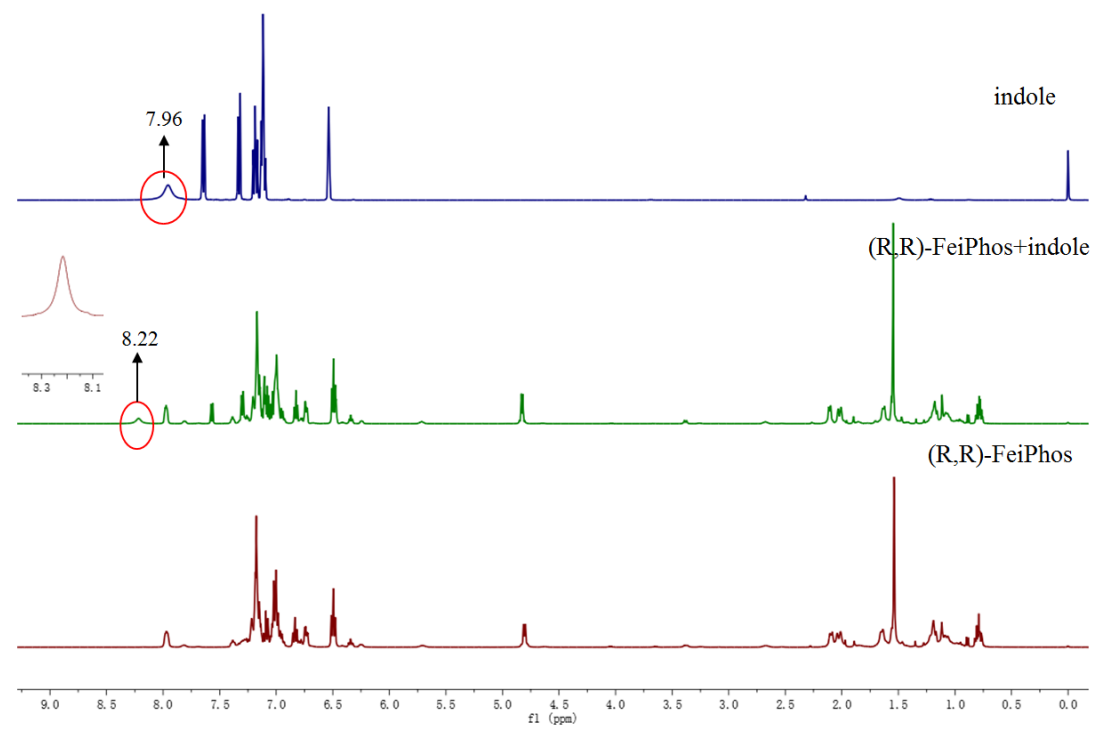

Figure S4-2. <sup>1</sup>H-NMR analysis
